# Supplementary material for: Submicronic Filtering Media Based on Electrospun Recycled PET Nanofibers: Development, Characterization, and Method to Manufacture Surgical Masks
Source: MDPI journal article supplement (doi:10.3390/nano12060925), 2022-03-11
Supplement: s1 [file s1]

# Submicronic Filtering Media Based on Electrospun Recycled PET Nanofibers: Development, Characterization and Method to Manufacture a Surgical Mask

Marta Baselga-Lahoz<sup>1</sup>, Cristina Yus<sup>1,2</sup>, Manuel Arruebo<sup>1,2,3,4</sup>, Víctor Sebastián<sup>1,2,3,4</sup>, Silvia Irusta<sup>1,2,3,4</sup>, Santiago Jiménez<sup>5</sup>

<sup>1</sup>Institute for Health Research Aragon (IIS Aragón), 50009 Zaragoza, Spain

<sup>2</sup>Instituto de Nanociencia y Materiales de Aragon (INMA), CSIC – University of Zaragoza, 50009 Zaragoza, Spain

<sup>3</sup>Department of Chemical Engineering, University of Zaragoza, Campus Río Ebro – I+D Building, 50018 Zaragoza, Spain

<sup>4</sup>Networking Research Center on Bioengineering, Biomaterials and Nanomedicine, CIBER-BBN, 28029 Madrid, Spain

<sup>5</sup>Laboratorio de Fluidodinámica y Tecnologías de la Combustión (Liftec), CSIC – University of Zaragoza, 50018 Zaragoza, Spain

## Supplementary Material Section

### *Retention efficiency and pressure drop determination*

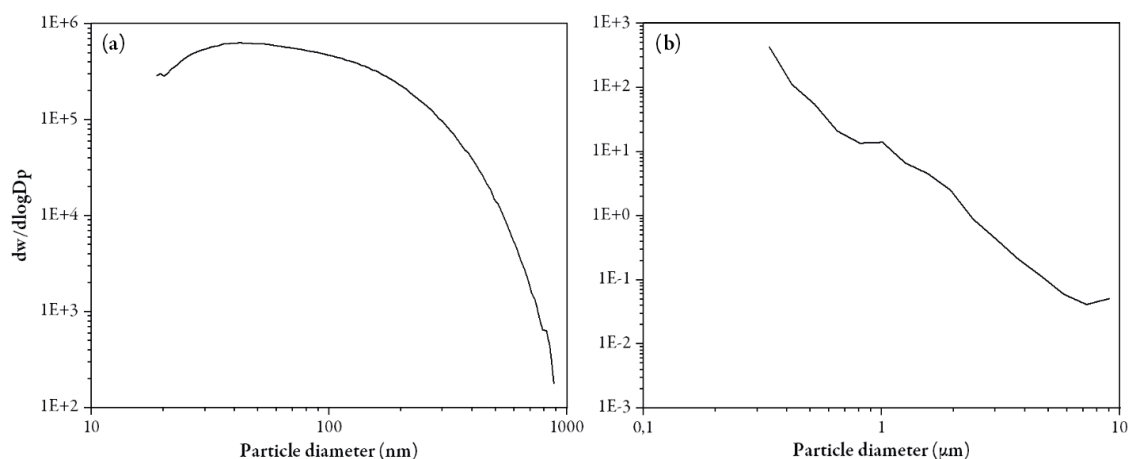

Figure S1. Particle concentration distribution depending on their diameter used for the efficiency determination measurements in the range (a) 0.01 - 0.5 μm (SMPS) and (b) > 0.5 μm (OPS).

### *Homogeneity across the fabric*

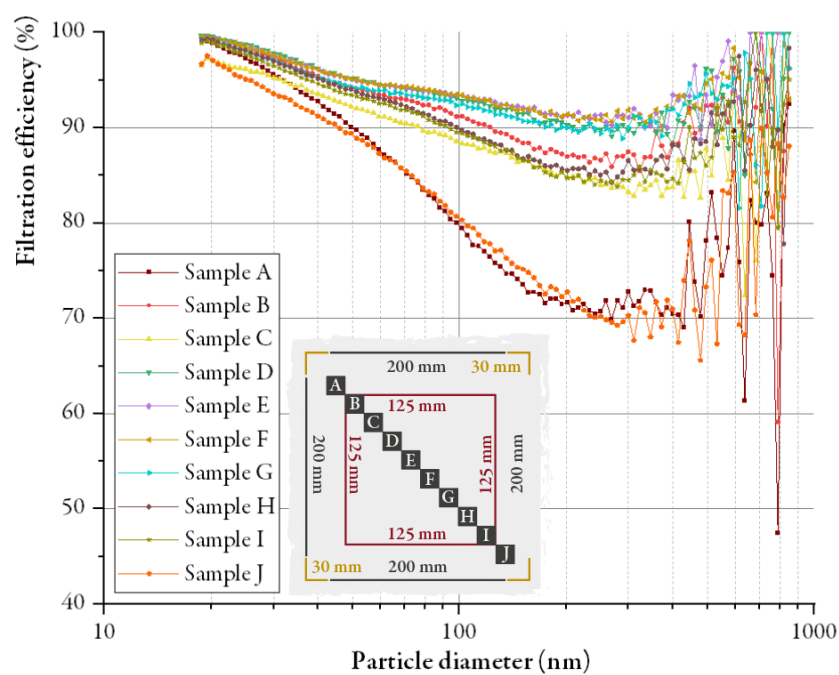

Figure S2. Evaluation of the homogeneity of a sample of filter fabric.

### *Drying of fabric samples*

Figure S2 shows the morphological deformation of the fibers after being exposed to a temperature of 80°C. The deterioration of the fibers is evident, finding notches on the surface of the fibers and a morphological change that translates into a greater porosity of the material.

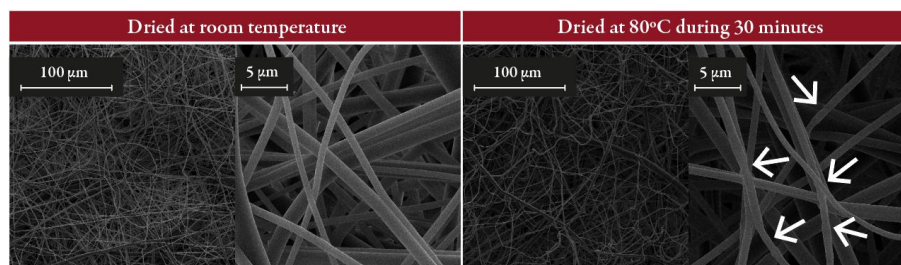

Figure S3. SEM images of fibers of the morphological deformation of PET fibers after being dried at 80°C for 30 minutes.
